# Supplementary material
Source: publisher figshare collection journal article supplement (https://gsajournals.figshare.com/ndownloader/files/30587082)
Supplement: Supplementary file 1 [file 30587082]

Table S1 Statistics of raw data and clean data sequenced by Nanopore

| Data type | SeqNum | Total bases(bp) | Length of N50(bp) | Length of N90(bp) | Average length of reads(bp) | Longest length of reads(bp) | Average quality value of reads |
| --- | --- | --- | --- | --- | --- | --- | --- |
| Raw data | 2,001,863 | 15,459,470,371 | 15,340 | 3,944 | 7,722 | 179,803 | 9.02 |
| Clean data | 1,281,664 | 14,422,688,817 | 15,776 | 5,485 | 11,253 | 179,733 | 9.11 |
